# Supplementary material for: Methylphenidate Exposure Induces Dopamine Neuron Loss and Activation of Microglia in the Basal Ganglia of Mice
Source: PLoS One. 2012 Mar 21;7(3):e33693. doi: 10.1371/journal.pone.0033693 (PMC3312333; doi:10.1371/journal.pone.0033693)
Supplement: Table S1 — Identification of differentially expressed genes (p≤0.05) in the substantia nigra comparing saline and 1 mg/kg MPH-treated mice. (XLS) [file pone.0033693.s001.xls]

## Sheet: Sheet1
Representative Public ID	Gene Title	Gene Symbol	1mg/kg MPH fold change
AI893437	guanylate cyclase 2c	Gucy2c	-0.98961
AK018111	sortilin-related VPS10 domain containing receptor 3	Sorcs3	-0.81057
AA067702	coiled-coil domain containing 91	Ccdc91	-0.79569
AV212090	phosphatidylserine decarboxylase /// phosphatidylserine decarboxylase, pseudogene 3	Pisd /// Pisd-ps3	-0.76802
BB428007	RIKEN cDNA 4930570G19 gene	4930570G19Rik	-0.73888
NM_011150	lectin, galactoside-binding, soluble, 3 binding protein	Lgals3bp	-0.71827
AK020670	lipoma HMGIC fusion partner-like 5	Lhfpl5	-0.71776
AI429738	NAC alpha domain containing	Nacad	-0.71052
BB528350	syndecan 3	Sdc3	-0.68629
AK005217	carbohydrate (N-acetylgalactosamine 4-0) sulfotransferase 8	Chst8	-0.67836
AK010274	suppressor of defective silencing 3 homolog (S. cerevisiae)	Suds3	-0.62977
BB208266	transmembrane protein 189	Tmem189	-0.61841
NM_008102	GTP cyclohydrolase 1	Gch1	-0.61303
BB009291	---	---	-0.6127
NM_007693	chromogranin A	Chga	-0.58293
AW048864	cholinergic receptor, nicotinic, alpha polypeptide 6	Chrna6	-0.5769
BC006876	chitinase domain containing 1	Chid1	-0.57607
AI642212	death-associated protein kinase 3	Dapk3	-0.57236
NM_009377	tyrosine hydroxylase	Th	-0.56768
BE824538	predicted gene 5868 /// solute carrier family 10 (sodium/bile acid cotransporter family), member 4	Gm5868 /// Slc10a4	-0.55458
NM_013510	erythrocyte protein band 4.1-like 1	Epb4.1l1	-0.55156
BB755506	heat shock protein, alpha-crystallin-related, B6	Hspb6	-0.54792
NM_133241	megalencephalic leukoencephalopathy with subcortical cysts 1 homolog (human)	Mlc1	-0.54213
NM_011430	synuclein, gamma	Sncg	-0.54031
AV122997	regulator of chromosome condensation 2	Rcc2	-0.53859
NM_010631	kinesin family member C3	Kifc3	-0.53413
NM_130882	cytochrome P450, family 4, subfamily f, polypeptide 13	Cyp4f13	-0.5254
AK004665	DEAH (Asp-Glu-Ala-His) box polypeptide 35	Dhx35	-0.52482
BE981269	Eph receptor A10	Epha10	-0.517
X84014	laminin, alpha 3	Lama3	-0.51606
BF302511	cDNA sequence BC048546	BC048546	-0.51482
BB827685	RGM domain family, member A	Rgma	-0.50809
AV333851	sorting nexin 22	Snx22	-0.50448
AF212320	Rac GTPase-activating protein 1	Racgap1	-0.50368
NM_030724	uridine-cytidine kinase 2	Uck2	-0.50061
BG965198	UDP-N-acetyl-alpha-D-galactosamine:polypeptide N-acetylgalactosaminyltransferase 10	Galnt10	-0.49456
NM_013782	phosphatidylserine synthase 2	Ptdss2	-0.48411
AV349520	D-2-hydroxyglutarate dehydrogenase	D2hgdh	-0.48119
BB745549	transmembrane protein 30A	Tmem30a	-0.47599
AK017564	armadillo repeat containing 9	Armc9	-0.47489
BB399635	ubiquitin-conjugating enzyme E2C binding protein	Ube2cbp	-0.47144
NM_011633	TNF receptor-associated factor 5	Traf5	-0.4655
NM_010077	dopamine receptor D2	Drd2	-0.46316
BM899529	glutamate receptor, ionotropic, kainate 3	Grik3	-0.4604
U36502	signal transducer and activator of transcription 5A	Stat5a	-0.44995
BB139464	major vault protein	Mvp	-0.44937
NM_031871	GH3 domain containing	Ghdc	-0.44905
BI248650	ArfGAP with RhoGAP domain, ankyrin repeat and PH domain 1	Arap1	-0.44303
BF471533	ret proto-oncogene	Ret	-0.43297
NM_011790	ariadne homolog 2 (Drosophila)	Arih2	-0.42779
BC027290	nucleolar protein 3 (apoptosis repressor with CARD domain)	Nol3	-0.41573
AI463328	protein kinase N1 /// prostaglandin E receptor 1 (subtype EP1)	Pkn1 /// Ptger1	-0.41374
AF113001	nuclear receptor co-repressor 2	Ncor2	-0.40407
L40172	Janus kinase 3	Jak3	-0.39976
BC024536	RIKEN cDNA 2410075B13 gene	2410075B13Rik	-0.39489
BC027099	UBX domain protein 10	Ubxn10	-0.39404
AI844703	tetraspanin 17	Tspan17	-0.38125
BB794177	regulator of G-protein signaling 20	Rgs20	-0.37999
BF460829	RIKEN cDNA 1110004E09 gene	1110004E09Rik	-0.3738
BC019641	B-cell CLL/lymphoma 9	Bcl9	-0.36964
AV000993	tryptophanyl tRNA synthetase 2 (mitochondrial)	Wars2	-0.36814
AK007659	catechol-O-methyltransferase domain containing 1	Comtd1	-0.3581
AF136571	ectonucleoside triphosphate diphosphohydrolase 5	Entpd5	-0.35743
NM_013590	lysozyme 1	Lyz1	-0.35615
NM_011734	sialic acid acetylesterase	Siae	-0.35192
BF018996	fibronectin type 3 and ankyrin repeat domains 1	Fank1	-0.34848
BG261907	like-glycosyltransferase /// glycosyltransferase-like protein LARGE1-like	Large /// LOC100505323	-0.33834
AK017519	RIKEN cDNA 5730408A14 gene	5730408A14Rik	-0.33229
AK019372	pseudouridylate synthase 7 homolog (S. cerevisiae)-like	Pus7l	-0.32835
AK003232	carbonyl reductase 3	Cbr3	0.32265
AK005888	RIKEN cDNA 1700012B07 gene	1700012B07Rik	0.32477
AI592978	RIKEN cDNA 9430019H13 gene	9430019H13Rik	0.32673
AW557641	---	---	0.33358
BB043465	solute carrier family 2 (facilitated glucose transporter), member 12	Slc2a12	0.36741
AW539319	---	---	0.37233
AA960166	tripartite motif-containing 25	Trim25	0.37243
BQ177934	cannabinoid receptor 1 (brain)	Cnr1	0.37343
NM_013773	T-cell leukemia/lymphoma 1B, 1	Tcl1b1	0.37439
BG695418	thymoma viral proto-oncogene 3	Akt3	0.38194
BC024705	RIKEN cDNA 1700054N08 gene	1700054N08Rik	0.39653
BB460975	PRP39 pre-mRNA processing factor 39 homolog (yeast)	Prpf39	0.40009
BB211804	---	---	0.4075
BM508495	SRY-box containing gene 11	Sox11	0.41193
BG071285	NOL1/NOP2/Sun domain family, member 4	Nsun4	0.41578
BG075869	---	---	0.4226
AK014755	caldesmon 1	Cald1	0.42586
AV353028	Caseinolytic peptidase X (E.coli)	Clpx	0.42892
AI647972	---	---	0.43051
AK017012	synuclein, alpha interacting protein (synphilin)	Sncaip	0.43853
BB225226	predicted gene 10419	Gm10419	0.46146
BB003572	storkhead box 2	Stox2	0.46562
BB037433	---	---	0.47813
BM117872	vasohibin 1	Vash1	0.48635
AV290571	complement component 2 (within H-2S)	C2	0.48913
BB040234	---	---	0.48973
AW493372	Adaptor-related protein complex 2, beta 1 subunit	Ap2b1	0.49493
BM224327	Fc receptor, IgG, low affinity IIb	Fcgr2b	0.52931
AV313559	oligonucleotide/oligosaccharide-binding fold containing 2A	Obfc2a	0.53112
BB211667	chromodomain helicase DNA binding protein 2	Chd2	0.5355
BB667902	---	---	0.54468
AK017619	disabled homolog 2 (Drosophila)	Dab2	0.54573
BC010840	LIM and SH3 protein 1	Lasp1	0.54762
BC014870	poly (ADP-ribose) polymerase family, member 3	Parp3	0.54839
BB184171	mitogen-activated protein kinase 8	Mapk8	0.58018
BB491630	---	---	0.58539
NM_031396	cyclin M1	Cnnm1	0.62306
BB348893	neuropilin (NRP) and tolloid (TLL)-like 2	Neto2	0.62369
BB167922	---	---	0.63112
AW987375	protein tyrosine phosphatase, non-receptor type 21	Ptpn21	0.66787
AV227574	complement component 2 (within H-2S)	C2	0.73047
NM_009871	cyclin-dependent kinase 5, regulatory subunit 1 (p35)	Cdk5r1	0.84481
BB332375	PNMA-like 2	Pnmal2	0.86685
BB433285	---	---	0.87239
AW012617	metastasis associated lung adenocarcinoma transcript 1 (non-coding RNA)	Malat1	0.8801
AW121365	---	---	1.3476
