# Supplementary material for: Methylphenidate Exposure Induces Dopamine Neuron Loss and Activation of Microglia in the Basal Ganglia of Mice
Source: PLoS One. 2012 Mar 21;7(3):e33693. doi: 10.1371/journal.pone.0033693 (PMC3312333; doi:10.1371/journal.pone.0033693)
Supplement: Table S2 — Identification of differentially expressed genes (p≤0.05) in the substantia nigra comparing saline and 10 mg/kg MPH-treated mice. (XLS) [file pone.0033693.s002.xls]

## Sheet: Sheet1
Representative Public ID	Gene Title	Gene Symbol	10mg/kg MPH fold change
AI893437	guanylate cyclase 2c	Gucy2c	-1.3977
BB371911	---	---	-1.2662
BB698398	GTP cyclohydrolase 1	Gch1	-0.87785
AA067702	coiled-coil domain containing 91	Ccdc91	-0.84844
NM_008102	GTP cyclohydrolase 1	Gch1	-0.83657
BF730189	zinc finger protein 14	Zfp14	-0.72325
AK020670	lipoma HMGIC fusion partner-like 5	Lhfpl5	-0.71088
AW048864	cholinergic receptor, nicotinic, alpha polypeptide 6	Chrna6	-0.67338
NM_011430	synuclein, gamma	Sncg	-0.66465
NM_009377	tyrosine hydroxylase	Th	-0.6608
AF158746	UDP-Gal:betaGlcNAc beta 1,4-galactosyltransferase, polypeptide 4	B4galt4	-0.6368
BF319573	MORN repeat containing 2	Morn2	-0.62853
NM_013510	erythrocyte protein band 4.1-like 1	Epb4.1l1	-0.62092
BF471533	ret proto-oncogene	Ret	-0.60784
AI463328	protein kinase N1 /// prostaglandin E receptor 1 (subtype EP1)	Pkn1 /// Ptger1	-0.58574
AV349520	D-2-hydroxyglutarate dehydrogenase	D2hgdh	-0.57984
BC018506	CCR4-NOT transcription complex, subunit 6-like	Cnot6l	-0.55557
AV334638	solute carrier family 18 (vesicular monoamine), member 2	Slc18a2	-0.55326
BG083583	microtubule-associated protein 1 light chain 3 beta	Map1lc3b	-0.5325
BB233055	rhomboid domain containing 2	Rhbdd2	-0.53099
BE951647	RIKEN cDNA C230096C10 gene	C230096C10Rik	-0.52507
X84014	laminin, alpha 3	Lama3	-0.51707
AI642212	death-associated protein kinase 3	Dapk3	-0.51584
BB757495	endo/exonuclease (5'-3'), endonuclease G-like	Exog	-0.51123
BC027290	nucleolar protein 3 (apoptosis repressor with CARD domain)	Nol3	-0.50207
NM_011790	ariadne homolog 2 (Drosophila)	Arih2	-0.48652
BC004850	twisted gastrulation homolog 1 (Drosophila)	Twsg1	-0.45685
NM_009658	aldo-keto reductase family 1, member B3 (aldose reductase)	Akr1b3	-0.45682
BC006605	expressed sequence AI661453	AI661453	-0.45308
C77501	predicted gene 13152	Gm13152	-0.44333
AK010846	transmembrane protein 185B	Tmem185b	-0.4273
AK006931	leucine rich repeat containing 27	Lrrc27	-0.42608
BB429201	prolactin receptor	Prlr	-0.40379
L40172	Janus kinase 3	Jak3	-0.37367
BB278948	RIKEN cDNA 9630033F20 gene	9630033F20Rik	-0.36829
AI447570	hypothetical LOC100503024	LOC100503024	-0.36272
BB399042	high mobility group box transcription factor 1	Hbp1	-0.33666
NM_133664	ladinin	Lad1	-0.32163
AW545934	transcription termination factor, RNA polymerase I	Ttf1	0.35872
AK014179	platelet endothelial aggregation receptor 1	Pear1	0.37387
AV364767	RAB38, member of RAS oncogene family	Rab38	0.39407
AV338185	RIKEN cDNA A630052C17 gene	A630052C17Rik	0.42883
AK014675	RIKEN cDNA 4833410I11 gene	4833410I11Rik	0.45796
AA960166	tripartite motif-containing 25	Trim25	0.48227
AK017012	synuclein, alpha interacting protein (synphilin)	Sncaip	0.49084
AK014755	caldesmon 1	Cald1	0.49363
NM_008926	protein kinase, cGMP-dependent, type II	Prkg2	0.51543
BM117872	vasohibin 1	Vash1	0.52695
NM_013785	inositol hexaphosphate kinase 1	Ip6k1	0.56731
NM_031396	cyclin M1	Cnnm1	0.60353
NM_021477	RNA binding protein, fox-1 homolog (C. elegans) 1	Rbfox1	0.69467
BB491630	---	---	0.70389
AK015394	ATP/GTP binding protein 1	Agtpbp1	0.835
AW121365	---	---	1.2581
